# Supplementary material for: Opposite Effect of Thyroid Hormones on Oxidative Stress and on Mitochondrial Respiration in COVID-19 Patients
Source: MDPI journal article supplement (doi:10.3390/antiox11101998), 2022-10-08
Supplement: s1 [file s1]

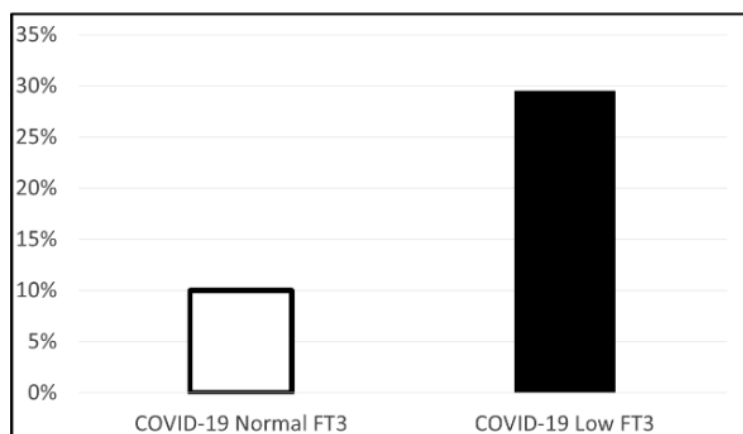

**Figure S1.** Lethality rate among COVID-19 patients with and w/o NTIS.

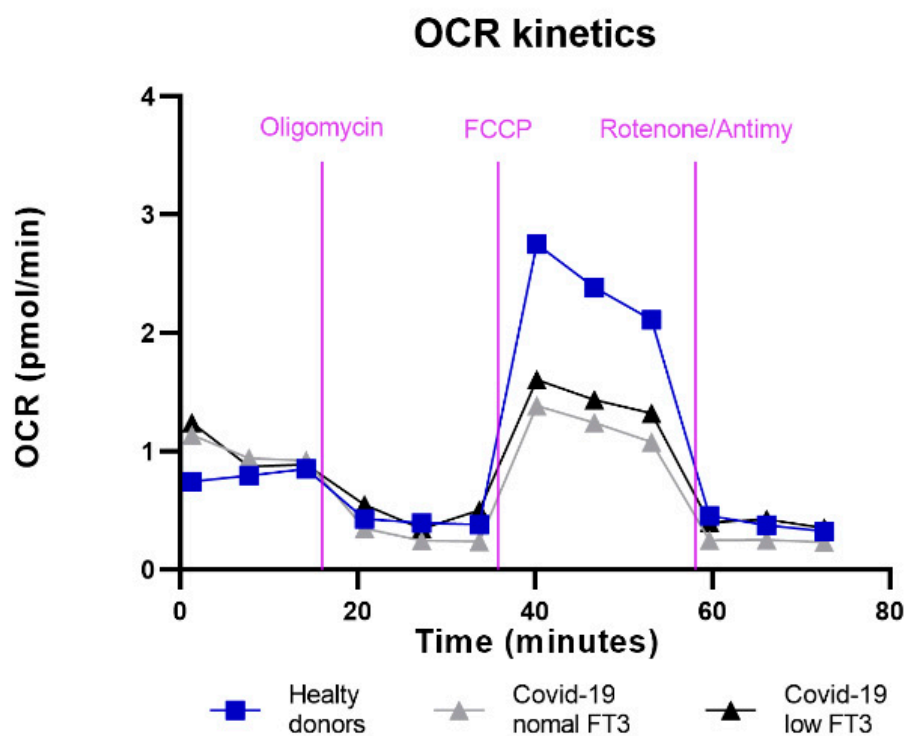

**Figure S2.** Mitochondrial respiration in COVID-19 patients compared to Healthy Donors. Medium traces of OCR of PBMCs from COVID-19 patients with and w/o NTIS and of healthy donors.
